# Supplementary material for: Application of multivariate analysis to the turbidimetric determination of sulphate in seawater
Source: Royal Society of Chemistry journal article supplement (doi:10.1039/c4ay00335g), 2014-01-01
Supplement: c4ay00335g1.pdf [file c4ay00335g1.pdf]

## **Application of multivariate analysis to the turbidimetric determination of sulphate in seawater**

**Leire Kortazar <sup>\*a</sup>, Janire Sáez <sup>a</sup>, Josu Agirre <sup>a</sup>, Jon Kepa Izaguirre <sup>a</sup>, Luis Angel Fernández <sup>a</sup>**

*Received (in XXX, XXX) Xth XXXXXXXXXX 20XX, Accepted Xth XXXXXXXXXX 20XX*

5 DOI: 10.1039/b000000x

<sup>a</sup> Department of Analytical Chemistry, University of the Basque Country, P.O. Box 644, 48080 Bilbao, Spain

\* Corresponding author.

Tel: +34 94 6012723

E-mail address: [kortazar.leire@gmail.com](mailto:kortazar.leire@gmail.com)

10

15

20

25

**1. Table 1.** Sulphate concentration obtained in each wavelength segment for the synthetic sample together with their extended uncertainties (U), Relative Standard Deviation (RSD) and errors with respect to the real and the reference method's values.

| Segment          | [SO <sub>4</sub> <sup>2-</sup> ]/mg L <sup>-1</sup> | U /mg L <sup>-1</sup> | RSD | Error (real value) | Error (vs. volumetry) |
|------------------|-----------------------------------------------------|-----------------------|-----|--------------------|-----------------------|
| 420 nm (univar.) | 4767                                                | 315                   | 3%  | 72%                | 78%                   |
| full spectra     | 2666                                                | 344                   | 6%  | 4%                 | 0%                    |
| 250-350 nm       | 5228                                                | 1431                  | 14% | 89%                | 96%                   |
| 350-450 nm       | 4604                                                | 245                   | 3%  | 66%                | 72%                   |
| 450-550 nm       | 2965                                                | 92                    | 2%  | 7%                 | 11%                   |
| 550-650 nm       | 2442                                                | 155                   | 3%  | 12%                | 9%                    |
| 600-700 nm       | 2582                                                | 156                   | 3%  | 7%                 | 3%                    |
| 600-800 nm       | 2789                                                | 211                   | 4%  | 1%                 | 4%                    |
| 650-750 nm       | 2740                                                | 226                   | 4%  | 1%                 | 2%                    |
| 700-800 nm       | 3553                                                | 206                   | 3%  | 28%                | 33%                   |

Electronic Supplementary Material (ESI) for Analytical Methods.

2. **Table 2.** Sulphate concentration in each segment of the real samples (L1 and L2) together with their extended uncertainties (U), Relative Standard Deviation (RSD) and error with respect to the reference method's value.

| L 1              | [SO <sub>4</sub> <sup>2-</sup> ] /mg L <sup>-1</sup> | U /mg L <sup>-1</sup> | RSD | Error |
|------------------|------------------------------------------------------|-----------------------|-----|-------|
| 420 nm (univar.) | 2162                                                 | 619                   | 14% | 78%   |
| full spectra     | 884                                                  | 326                   | 18% | 27%   |
| 250-350 nm       | 2416                                                 | 1652                  | 34% | 99%   |
| 350-450 nm       | 1127                                                 | 496                   | 22% | 7%    |
| 450-550 nm       | 584                                                  | 408                   | 32% | 52%   |
| 550-650 nm       | 1296                                                 | 304                   | 12% | 7%    |
| 600-700 nm       | 1077                                                 | 419                   | 19% | 12%   |
| 600-800 nm       | 1261                                                 | 504                   | 20% | 4%    |
| 650-750 nm       | 944                                                  | 557                   | 29% | 22%   |
| 700-800 nm       | 1709                                                 | 418                   | 12% | 40%   |
| L2               | [SO <sub>4</sub> <sup>2-</sup> ] /mg L <sup>-1</sup> | U /mg L <sup>-1</sup> | RSD | Error |
| 420 nm (univar.) | 4240                                                 | 116                   | 1%  | 60%   |
| full spectra     | 3857                                                 | 200                   | 3%  | 45%   |
| 250-350 nm       | 5176                                                 | 477                   | 5%  | 95%   |
| 350-450 nm       | 4363                                                 | 188                   | 2%  | 64%   |
| 450-550 nm       | 3754                                                 | 208                   | 3%  | 41%   |
| 550-650 nm       | 3335                                                 | 287                   | 4%  | 25%   |
| 600-700 nm       | 3181                                                 | 286                   | 4%  | 20%   |
| 600-800 nm       | 3079                                                 | 261                   | 4%  | 16%   |
| 650-750 nm       | 3064                                                 | 277                   | 5%  | 15%   |
| 700-800 nm       | 2981                                                 | 235                   | 4%  | 12%   |
